# Supplementary material
Source: PubMed Central journal article supplement (PMC5274700)

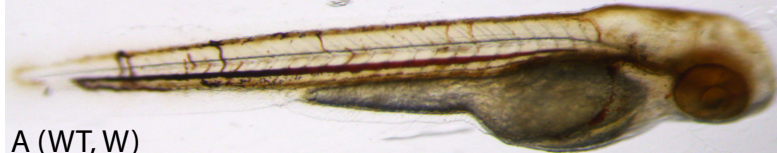

A (WT, W)

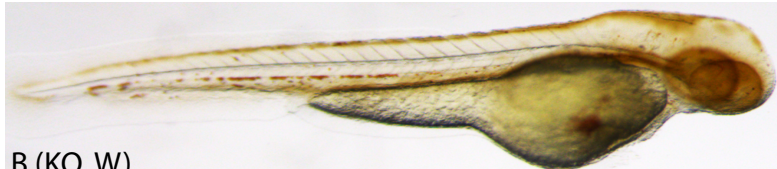

B (KO, W)

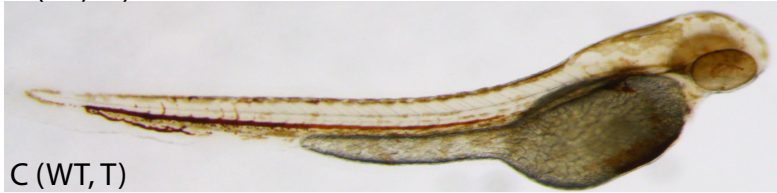

C (WT, T)

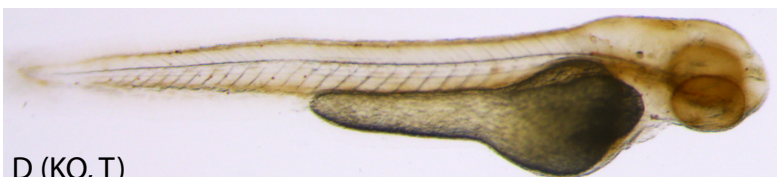

D (KO, T)

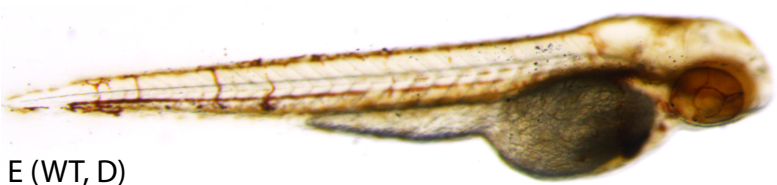

E (WT, D)

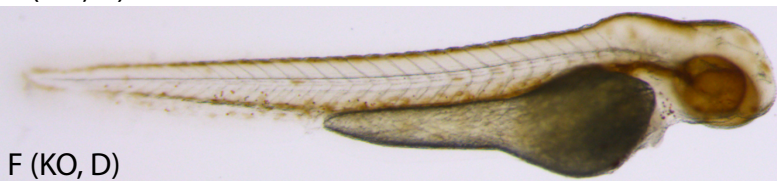

F (KO, D)

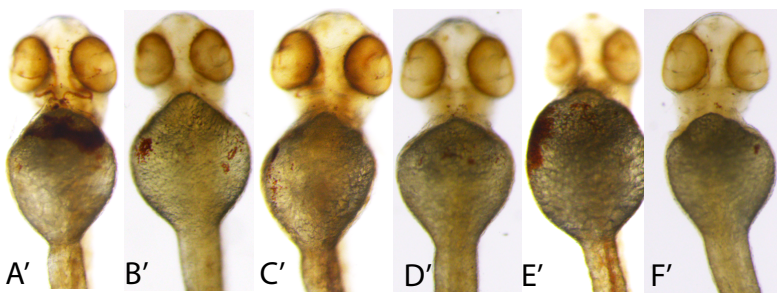

A'

B'

C'

D'

E'

F'

Supplement: NIHMS842788-supplement-suppl5.pdf [file NIHMS842788-supplement-suppl5.pdf]

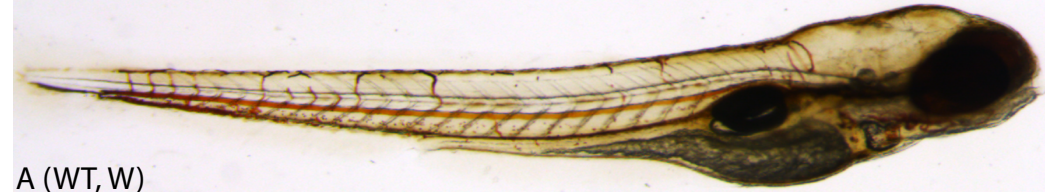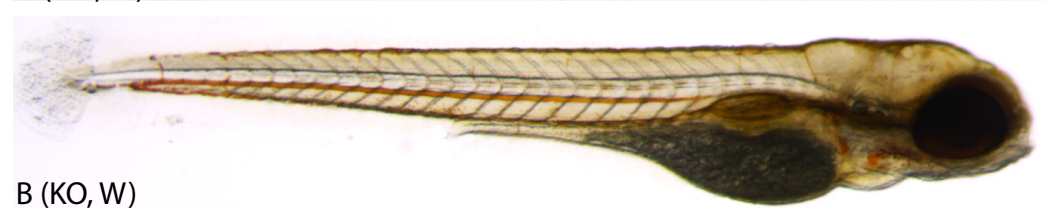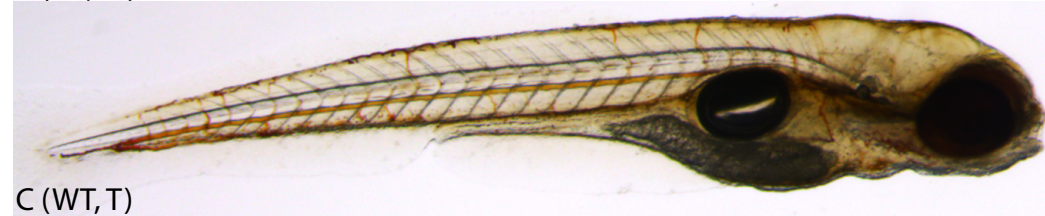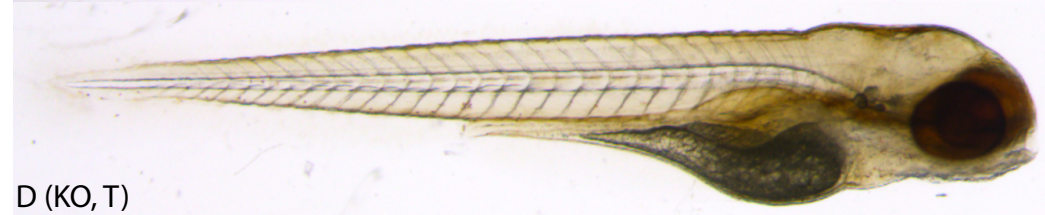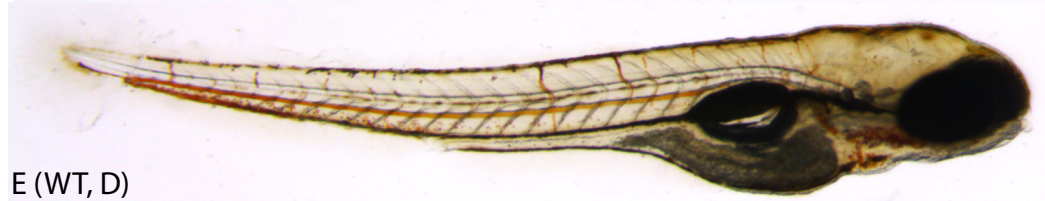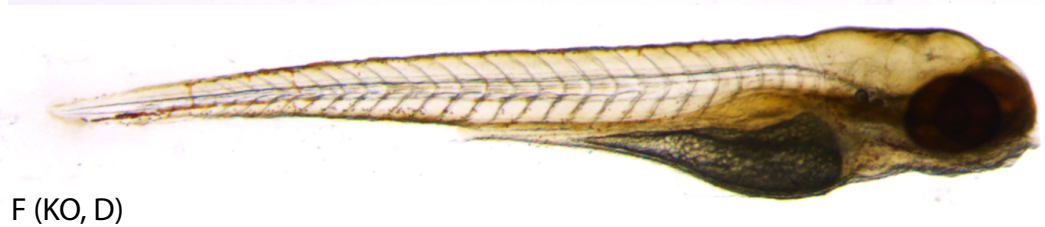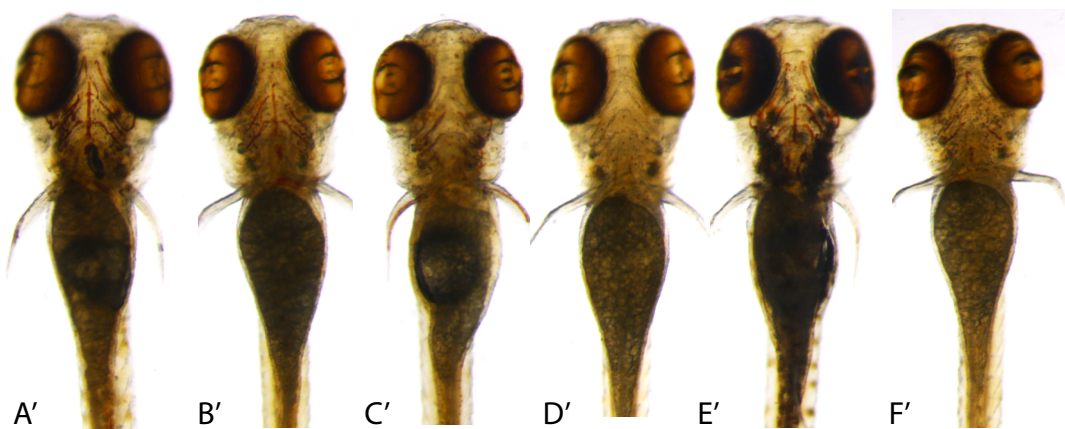

Supplement: NIHMS842788-supplement-suppl6.pdf [file NIHMS842788-supplement-suppl6.pdf]
